# Supplementary material for: Childhood neurodevelopment after prescription of maintenance methadone for opioid dependency in pregnancy: a systematic review and meta‐analysis
Source: PubMed Central journal article supplement (PMC6617808; doi:10.1111/dmcn.14117), 2018-12-03

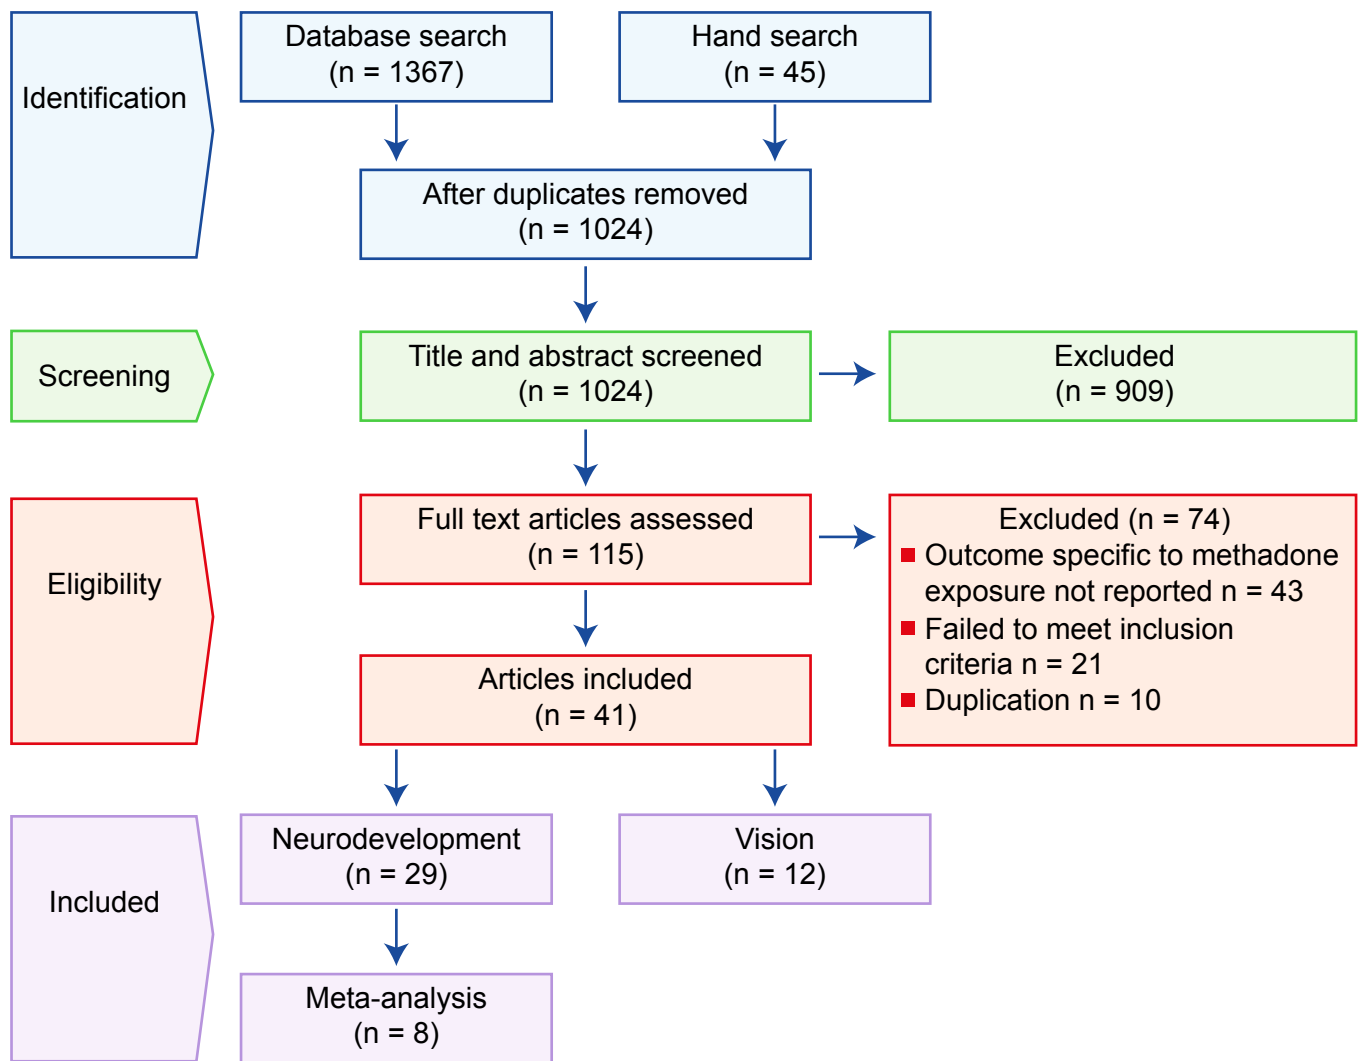

Supplement: DMCN-61-750-s001.pdf [file DMCN-61-750-s001.pdf]
